# Supplementary material for: Theory and practice in medical education – expectations and development of skills experienced by students of human medicine compared with students in other disciplines
Source: PubMed Central journal article supplement (PMC4330638; doi:10.3205/zma000950), 2015-02-11

What is particularly important to you personally in a career?

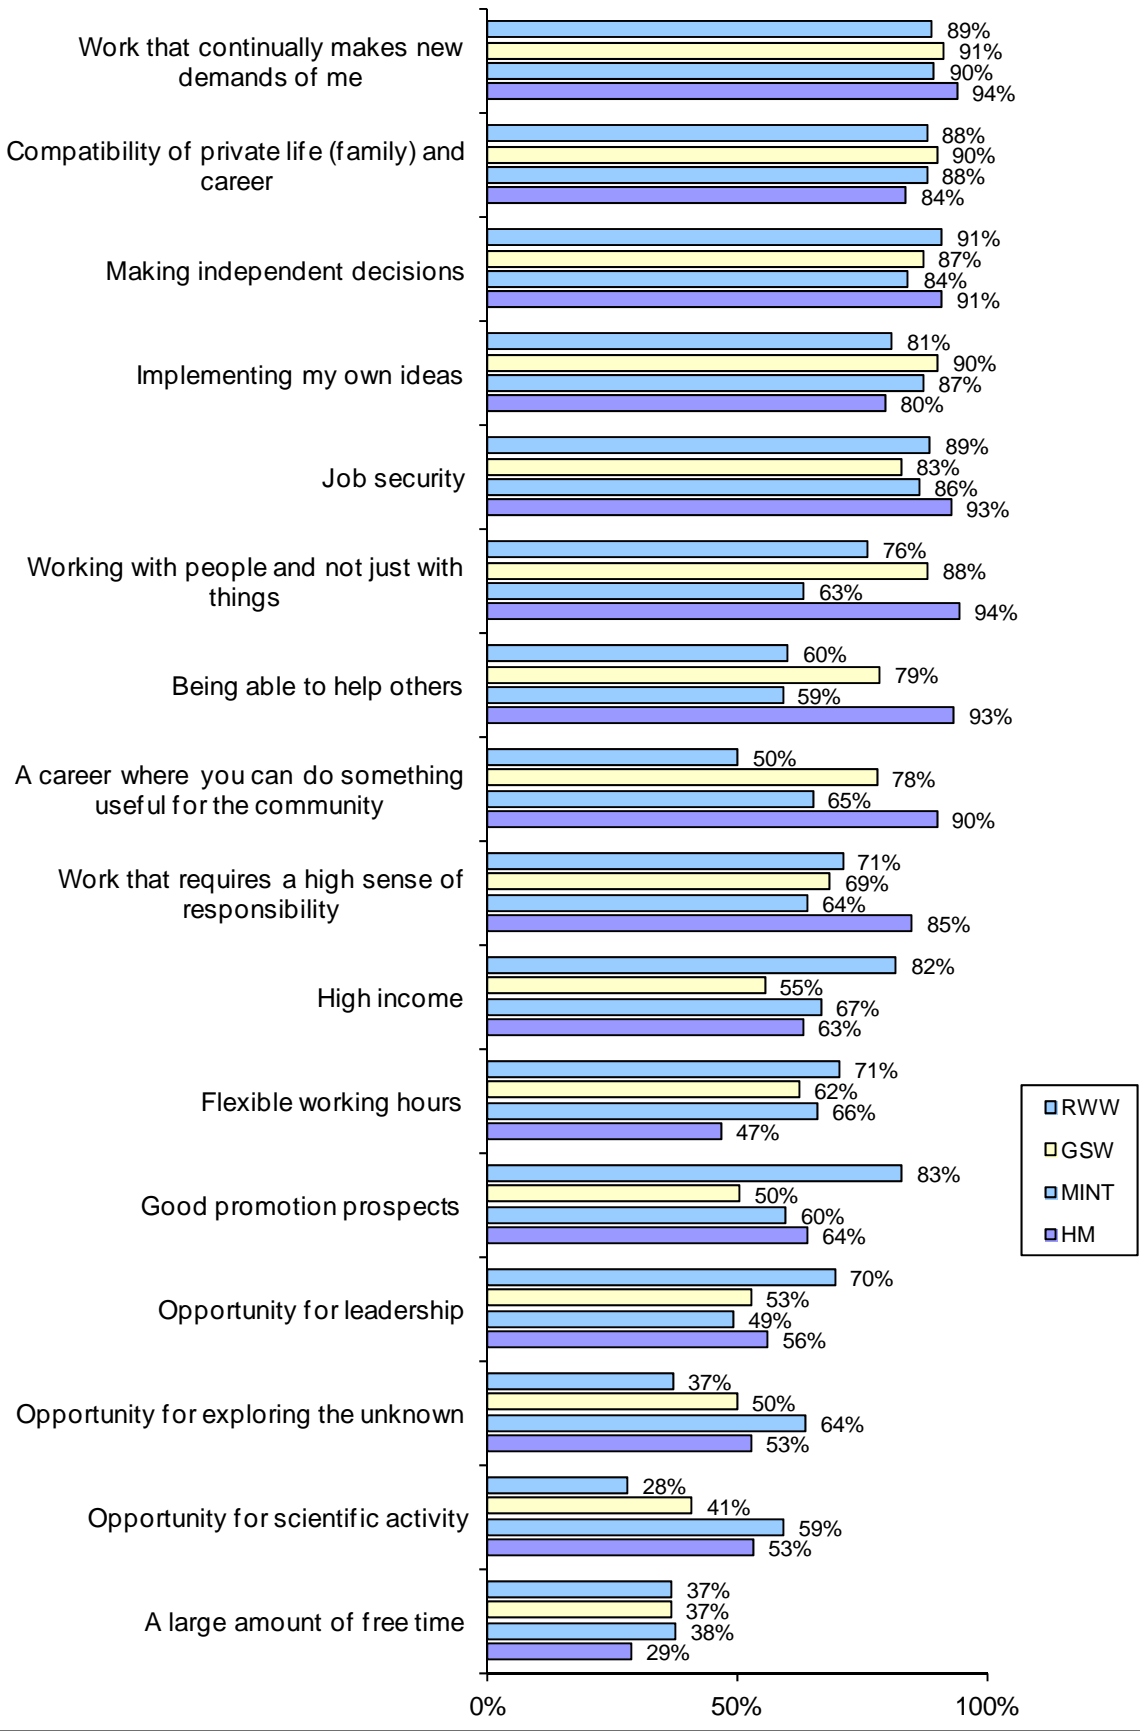

Supplement: ZMA-32-8-s-001.pdf [file ZMA-32-8-s-001.pdf]
